# Supplementary material for: Predictive Hyperglycemia and Hypoglycemia Minimization: In-Home Evaluation of Safety, Feasibility, and Efficacy in Overnight Glucose Control in Type 1 Diabetes
Source: Oxford University Press journal article supplement (doi:10.2337/dc16-1794), 2017-01-18
Supplement: dc161794supplementarydata.pdf [file dc161794supplementarydata.pdf]

## SUPPLEMENTARY DATA

### Supplementary Table S1. Eligibility and Exclusion Criteria

#### Eligibility Criteria

- 1) Clinical diagnosis of type 1 diabetes and using daily insulin therapy for at least one year and an insulin infusion pump for at least 6 months (*The diagnosis of type 1 diabetes is based on the investigator's judgment; C peptide level and antibody determinations were not required*)
- 2) Age 15 - 45 years
- 3) Glycated hemoglobin level  $\leq 10.0\%$  (86 mmol/mol)
  - Measured with DCA2000 or equivalent device for assessing eligibility
  - Glycated hemoglobin measurements performed as part of usual clinical care within 2 weeks prior to obtaining informed consent for participation in the trial may be used.
- 4) Uninterrupted internet access while study system in use overnight and for uploading of study data the following morning
- 5) Living with a significant other or family member (“companion”) committed to participating in all study activities, and being present and available to provide assistance when the system is in use at night
- 6) An understanding of and willingness to follow the protocol and sign the informed consent

#### Exclusion Criteria

- 1) Diabetic ketoacidosis in the past 6 months
- 2) Hypoglycemic seizure or loss of consciousness in the past 6 months
- 3) History of seizure disorder (except for hypoglycemic seizure)
- 4) History of any heart disease including coronary artery disease, heart failure, or arrhythmias
- 5) Cystic fibrosis
- 6) Current use of oral/inhaled glucocorticoids, beta-blockers or other medications, which in the judgment of the investigator would be a contraindication to participation in the study.
- 7) History of ongoing renal disease (other than microalbuminuria). Creatinine level to have been obtained within the last year if participant has diabetes of >10 years duration. If creatinine is >1.5 mg/dL (132  $\mu\text{mol/L}$ ), the participant is excluded.
- 8) Medical or psychiatric condition that in the judgment of the investigator might interfere with the completion of the protocol such as:
  - Inpatient psychiatric treatment in the past 6 months
  - Uncontrolled adrenal disorder
  - Abuse of alcohol
- 9) Pregnancy  
*If female and sexually active, must agree to use a form of contraception to prevent pregnancy while a participant in the study. A negative serum pregnancy test will be required for all premenopausal women who are not surgically sterile. Participants who become pregnant will be discontinued from the study.*
- 10) Liver disease as defined by an ALT greater than 3 times the upper limit of normal

SUPPLEMENTARY DATA

Supplementary Figure S2. Study Flowchart

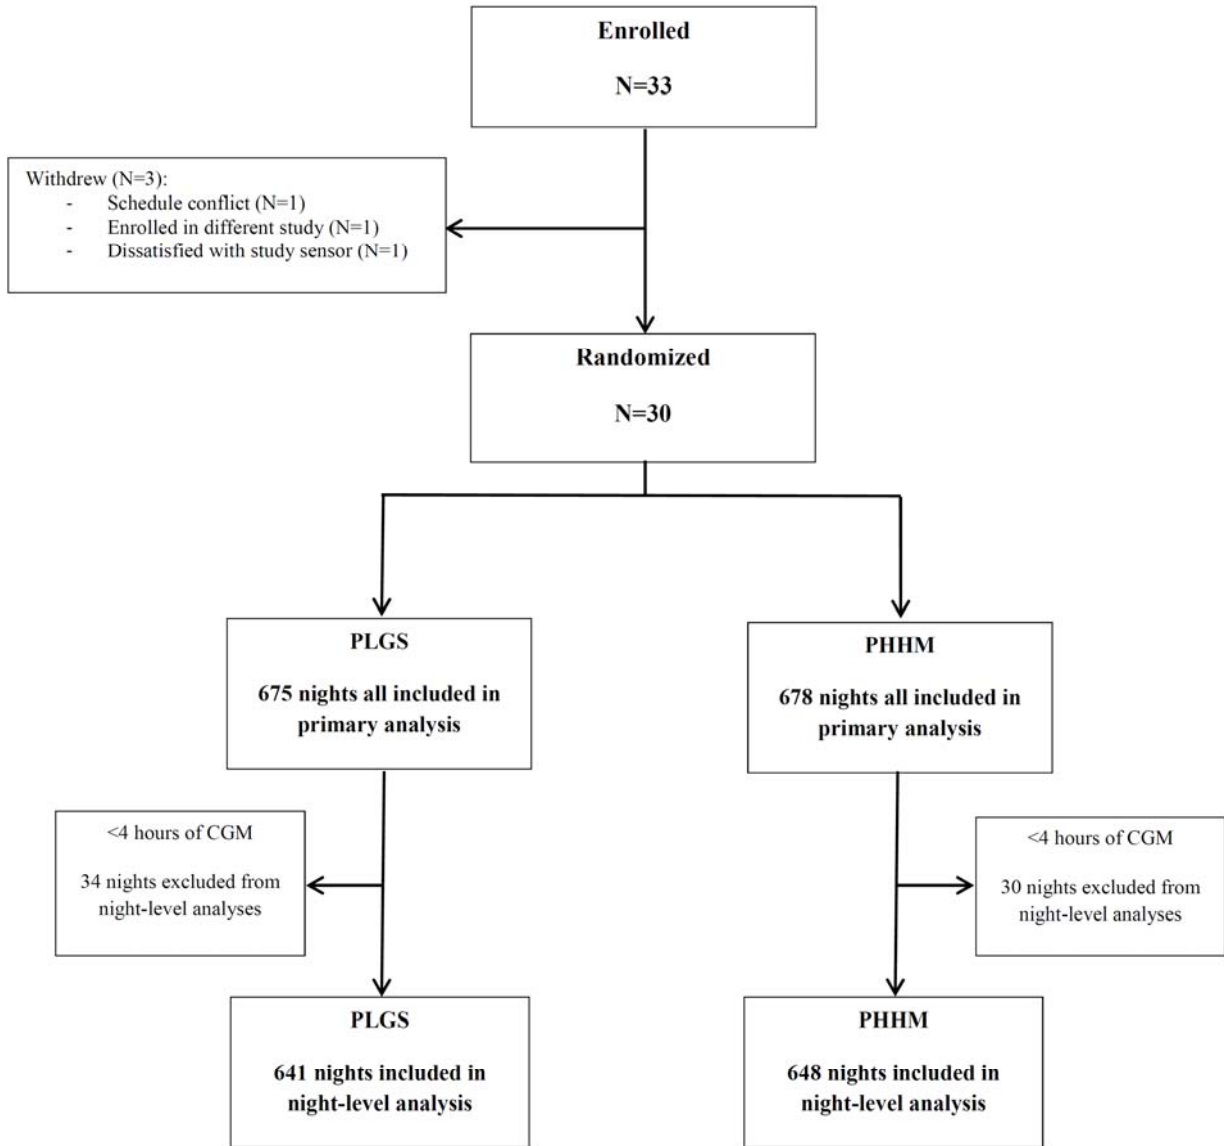

SUPPLEMENTARY DATA

**Supplementary Table S3. Participant Characteristics at Enrollment (N=30 Participants) – medians (IQR) or n (%)**

| Characteristic                       |                   |
|--------------------------------------|-------------------|
| Age (yrs)                            | 31 (22, 38)       |
| <i>Range</i>                         | 15 to 43          |
| Male                                 | 15 (50%)          |
| Race                                 |                   |
| White non-Hispanic                   | 26 (87%)          |
| Hispanic                             | 2 (7%)            |
| Pacific Islander                     | 1 (3%)            |
| Unknown                              | 1 (3%)            |
| Diabetes duration (yr)               | 17 (11, 27)       |
| <i>Range</i>                         | 3 to 38           |
| Body-mass index (kg/m <sup>2</sup> ) | 26.4 (23.0, 30.1) |
| Daily insulin dose (U/kg/day)        | 0.58 (0.46, 0.68) |
| Enrollment HbA1c (%)                 | 7.5 (6.9, 7.7)    |
| (mmol/mol)                           | 58 (52, 61)       |
| Randomization HbA1c (%)              | 7.1 (6.7, 7.4)    |
| (mmol/mol)                           | 54 (50, 57)       |
| End of study HbA1c (%)               | 7.1 (6.6, 7.4)    |
| (mmol/mol)                           | 54 (49, 57)       |

SUPPLEMENTARY DATA

**Supplementary Table S4. Night-Level Secondary Insulin Outcomes**

|                                                                   | <b>PLGS</b>     | <b>PHHM</b>     | <b>P-value</b>  |
|-------------------------------------------------------------------|-----------------|-----------------|-----------------|
|                                                                   | <b>Nights</b>   | <b>Nights</b>   |                 |
| # Randomized Nights with Complete Insulin Data                    | 640*            | 648             |                 |
| Total Basal Insulin Units [median (IQR)]                          | 7.0 (4.8, 10.0) | 7.2 (5.3, 9.8)  | 0.37            |
| Nights with Automatic Boluses [n(%)]                              | NA              | 506 (78%)       | NA              |
| Total Automatic Boluses Insulin Units <sup>†</sup> [median (IQR)] | NA              | 1.2 (0.4, 2.5)  | NA              |
| Number of Automatic Boluses <sup>†</sup> [median (IQR)]           | NA              | 17 (9, 34)      | NA              |
| Nights with Manual Boluses [n(%)]                                 | 158 (25%)       | 109 (17%)       | test not done § |
| Total Manual Boluses Insulin Units <sup>‡</sup> [median (IQR)]    | 2.2 (1.3, 4.8)  | 1.3 (0.6, 2.9)  | test not done § |
| Number of Manual Boluses <sup>‡</sup> [median (IQR)]              | 1 (1, 1)        | 1 (1, 1)        | NA              |
| Nights with Both Automatic and Manual Boluses [n(%)]              | NA              | 85 (13%)        | NA              |
| Total Automatic Boluses Insulin Units* [median (IQR)]             | NA              | 1.8 (0.9, 3.0)  | NA              |
| Number of Automatic Boluses* [median (IQR)]                       | NA              | 21 (12, 36)     | NA              |
| Total Manual Boluses Insulin Units* [median (IQR)]                | NA              | 1.2 (0.6, 2.8)  | NA              |
| Number of Manual Boluses* [median (IQR)]                          | NA              | 1 (1, 1)        | NA              |
| Total Basal and Boluses Insulin Units [median (IQR)]              | 7.5 (5.2, 10.8) | 8.4 (6.0, 12.0) | <0.001          |

\* One night excluded from all insulin analyses due to missing basal data.

† Among nights with automatic boluses only.

‡ Among nights with manual boluses only.

\* Among nights with both automatic and manual boluses only.

§ Test not of interest and not done.

SUPPLEMENTARY DATA

**Supplementary Figure S5.** Representative session plot from a night that included both automated correction boluses and automated predictive low-glucose suspend

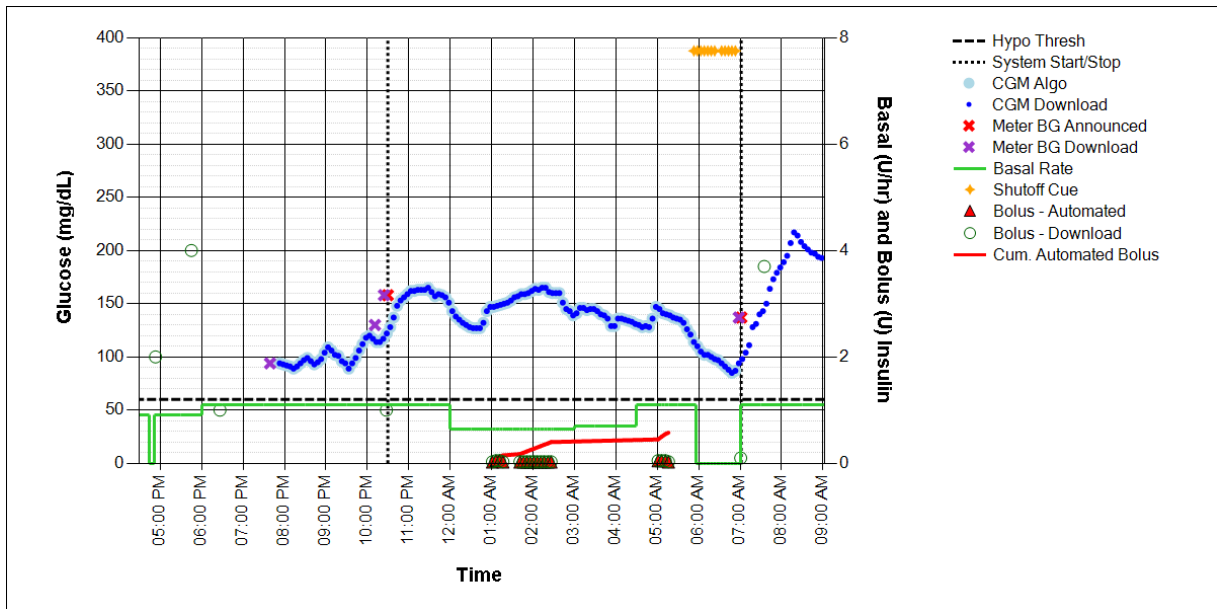

SUPPLEMENTARY DATA

**Supplementary Table S6.** Additional Efficacy and Safety Night-Level Secondary Outcomes\*

|                                                                       | <b>PLGS</b>   | <b>PHHM</b>   | <b>P-value</b>  |
|-----------------------------------------------------------------------|---------------|---------------|-----------------|
|                                                                       | <b>Nights</b> | <b>Nights</b> |                 |
| # Randomized Nights                                                   | 641           | 648           |                 |
| Hours of Glucose Readings                                             |               |               |                 |
| <i>median</i>                                                         | 8.0           | 8.3           |                 |
| % Morning with blood glucose <sup>†</sup>                             |               |               |                 |
| <60 mg/dL <i>n</i> (%)                                                | 2 (<1%)       | 3 (<1%)       |                 |
| 60 to 69 mg/dL <i>n</i> (%)                                           | 5 (<1%)       | 5 (<1%)       |                 |
| 70 to 180 mg/dL <i>n</i> (%)                                          | 421 (66%)     | 542 (84%)     |                 |
| 181 to 250 mg/dL <i>n</i> (%)                                         | 158 (25%)     | 83 (13%)      |                 |
| >250 mg/dL <i>n</i> (%)                                               | 54 (8%)       | 15 (2%)       |                 |
| % Nights with blood ketone $\geq$ 0.6 mmol/L <i>n</i> (%)             | 3 (<1%)       | 0 (0%)        | NA <sup>‡</sup> |
| <b>Cumulative Sensor Metrics</b>                                      |               |               |                 |
| % of nights with glucose level <50 mg/dL for a cumulative duration of |               |               |                 |
| >5 min <i>n</i> (%)                                                   | 21 (3%)       | 29 (4%)       | 0.20            |
| >60 min <i>n</i> (%)                                                  | 3 (<1%)       | 6 (<1%)       | NA <sup>‡</sup> |
| >120 min <i>n</i> (%)                                                 | 1 (<1%)       | 4 (<1%)       | NA <sup>‡</sup> |
| >180 min <i>n</i> (%)                                                 | 1 (<1%)       | 2 (<1%)       | NA <sup>‡</sup> |
| % of nights with glucose level <60 mg/dL for a cumulative duration of |               |               |                 |
| >5 min <i>n</i> (%)                                                   | 64 (10%)      | 63 (10%)      | 0.93            |
| >60 min <i>n</i> (%)                                                  | 19 (3%)       | 21 (3%)       | 0.67            |
| >120 min <i>n</i> (%)                                                 | 2 (<1%)       | 6 (<1%)       | NA <sup>‡</sup> |
| >180 min <i>n</i> (%)                                                 | 1 (<1%)       | 5 (<1%)       | NA <sup>‡</sup> |
| % of nights with glucose level <70 mg/dL for a cumulative duration of |               |               |                 |

SUPPLEMENTARY DATA

|                                                                                    | <b>PLGS</b>   | <b>PHHM</b>   | <b>P-value</b>  |
|------------------------------------------------------------------------------------|---------------|---------------|-----------------|
|                                                                                    | <b>Nights</b> | <b>Nights</b> |                 |
| >5 min <i>n</i> (%)                                                                | 113 (18%)     | 113 (17%)     | 0.94            |
| >60 min <i>n</i> (%)                                                               | 52 (8%)       | 55 (8%)       | 0.72            |
| >120 min <i>n</i> (%)                                                              | 16 (2%)       | 21 (3%)       | 0.25            |
| >180 min <i>n</i> (%)                                                              | 4 (<1%)       | 9 (1%)        | 0.002           |
| <b>% of nights with glucose level &gt;180 mg/dL for a cumulative duration of</b>   |               |               |                 |
| >5 min <i>n</i> (%)                                                                | 418 (65%)     | 402 (62%)     | 0.01            |
| >60 min <i>n</i> (%)                                                               | 323 (50%)     | 284 (44%)     | 0.002           |
| >120 min <i>n</i> (%)                                                              | 254 (40%)     | 197 (30%)     | <0.001          |
| >180 min <i>n</i> (%)                                                              | 201 (31%)     | 152 (23%)     | <0.001          |
| <b>% of nights with glucose level &gt;250 mg/dL for a cumulative duration of</b>   |               |               |                 |
| >5 min <i>n</i> (%)                                                                | 163 (25%)     | 103 (16%)     | <0.001          |
| >60 min <i>n</i> (%)                                                               | 92 (14%)      | 44 (7%)       | <0.001          |
| >120 min <i>n</i> (%)                                                              | 74 (12%)      | 31 (5%)       | <0.001          |
| >180 min <i>n</i> (%)                                                              | 48 (7%)       | 19 (3%)       | <0.001          |
| <b>% of nights with glucose level &gt;300 mg/dL for a cumulative duration of</b>   |               |               |                 |
| >5 min <i>n</i> (%)                                                                | 40 (6%)       | 26 (4%)       | 0.02            |
| >60 min <i>n</i> (%)                                                               | 29 (5%)       | 11 (2%)       | <0.001          |
| >120 min <i>n</i> (%)                                                              | 17 (3%)       | 6 (<1%)       | <0.001          |
| >180 min <i>n</i> (%)                                                              | 9 (1%)        | 2 (<1%)       | NA <sup>‡</sup> |
| <b>Consecutive Sensor Metrics</b>                                                  |               |               |                 |
| <b>% of nights with glucose level &lt;50 mg/dL consecutively for a duration of</b> |               |               |                 |
| >10 min <i>n</i> (%)                                                               | 20 (3%)       | 28 (4%)       | 0.18            |
| >25 min <i>n</i> (%)                                                               | 12 (2%)       | 16 (2%)       | 0.30            |

SUPPLEMENTARY DATA

|                                                                           | <b>PLGS</b>   | <b>PHHM</b>   | <b>P-value</b>  |
|---------------------------------------------------------------------------|---------------|---------------|-----------------|
|                                                                           | <b>Nights</b> | <b>Nights</b> |                 |
| >30 min <i>n</i> (%)                                                      | 9 (1%)        | 14 (2%)       | 0.11            |
| >60 min <i>n</i> (%)                                                      | 3 (<1%)       | 6 (<1%)       | NA <sup>‡</sup> |
| >120 min <i>n</i> (%)                                                     | 1 (<1%)       | 4 (<1%)       | NA <sup>‡</sup> |
| % of nights with glucose level <60 mg/dL consecutively for a duration of  |               |               |                 |
| >10 min <i>n</i> (%)                                                      | 58 (9%)       | 57 (9%)       | 0.86            |
| >25 min <i>n</i> (%)                                                      | 35 (5%)       | 43 (7%)       | 0.30            |
| >30 min <i>n</i> (%)                                                      | 32 (5%)       | 38 (6%)       | 0.38            |
| >60 min <i>n</i> (%)                                                      | 17 (3%)       | 16 (2%)       | 0.73            |
| >120 min <i>n</i> (%)                                                     | 1 (<1%)       | 4 (<1%)       | NA <sup>‡</sup> |
| % of nights with glucose level <70 mg/dL consecutively for a duration of  |               |               |                 |
| >10 min <i>n</i> (%)                                                      | 105 (16%)     | 108 (17%)     | 0.74            |
| >25 min <i>n</i> (%)                                                      | 84 (13%)      | 84 (13%)      | 0.99            |
| >30 min <i>n</i> (%)                                                      | 76 (12%)      | 76 (12%)      | 0.97            |
| >60 min <i>n</i> (%)                                                      | 51 (8%)       | 46 (7%)       | 0.51            |
| >120 min <i>n</i> (%)                                                     | 13 (2%)       | 15 (2%)       | 0.49            |
| % of nights with glucose level >180 mg/dL consecutively for a duration of |               |               |                 |
| >30 min <i>n</i> (%)                                                      | 366 (57%)     | 337 (52%)     | 0.004           |
| >60 min <i>n</i> (%)                                                      | 316 (49%)     | 273 (42%)     | <0.001          |
| >120 min <i>n</i> (%)                                                     | 224 (35%)     | 176 (27%)     | <0.001          |
| % of nights with glucose level >250 mg/dL consecutively for a duration of |               |               |                 |
| >30 min <i>n</i> (%)                                                      | 116 (18%)     | 66 (10%)      | <0.001          |
| >60 min <i>n</i> (%)                                                      | 84 (13%)      | 42 (6%)       | <0.001          |
| >120 min <i>n</i> (%)                                                     | 64 (10%)      | 24 (4%)       | <0.001          |



SUPPLEMENTARY DATA

|                                                                           | <b>PLGS</b>   | <b>PHHM</b>   | <b>P-value</b>  |
|---------------------------------------------------------------------------|---------------|---------------|-----------------|
|                                                                           | <b>Nights</b> | <b>Nights</b> |                 |
| % of nights with glucose level >300 mg/dL consecutively for a duration of |               |               |                 |
| >30 min <i>n</i> (%)                                                      | 32 (5%)       | 16 (2%)       | <0.001          |
| >60 min <i>n</i> (%)                                                      | 25 (4%)       | 11 (2%)       | <0.001          |
| >120 min <i>n</i> (%)                                                     | 14 (2%)       | 4 (<1%)       | NA <sup>‡</sup> |

\*Glucose results from CGM unless specified as blood glucose.

†One PLGS night without morning blood glucose data

‡Too few events for formal statistical comparison

To convert glucose to mmol/L, multiply by 0.0555.

SUPPLEMENTARY DATA

**Supplementary Figure S7. Percent Time Glucose in Range 70 to 180, Below 70, and Above 180 mg/dL (A) and Mean Glucose (B) after System Deactivation for the Two Treatment Arms**

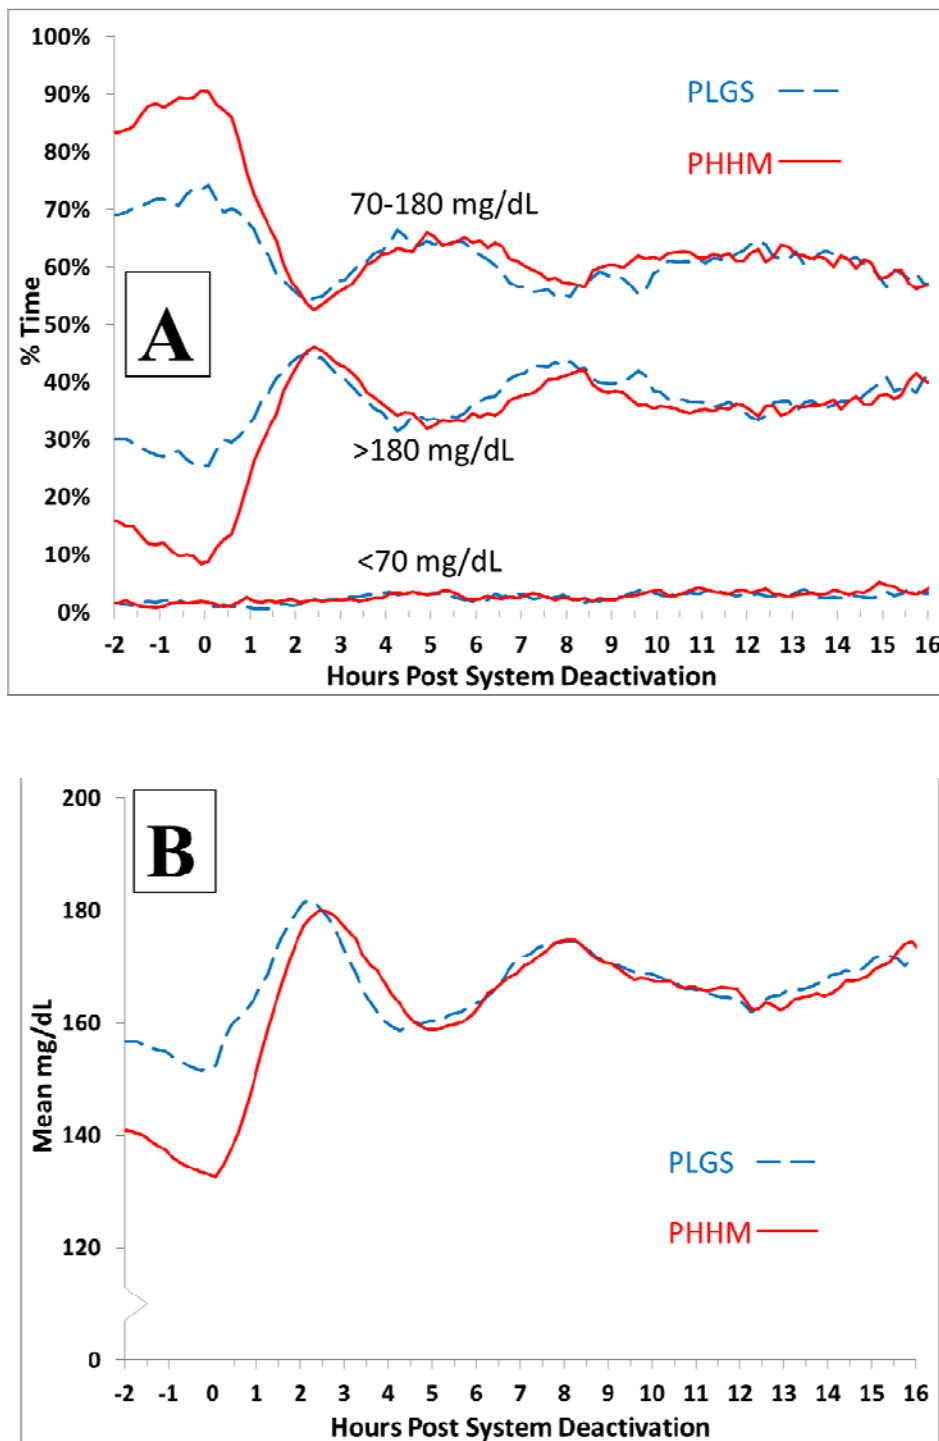

SUPPLEMENTARY DATA

**Supplementary Table S8. System Performance Metrics (N=30 Participants)**

|                                                                                                                                                    | <b>PLGS</b>   | <b>PHHM</b>   | <b>All</b>    |
|----------------------------------------------------------------------------------------------------------------------------------------------------|---------------|---------------|---------------|
|                                                                                                                                                    | <b>Nights</b> | <b>Nights</b> | <b>Nights</b> |
| % Time CGM device functional while controller was active (i.e. readings available in post-hoc device download)                                     | 92%           | 91%           | 91%           |
| % of available CGM readings obtained by controller                                                                                                 |               |               |               |
| within 10 minutes of CGM reading                                                                                                                   | 93%           | 92%           | 92%           |
| within 20 minutes of CGM reading                                                                                                                   | 97%           | 97%           | 97%           |
| % Automatic Bolus Requests Successfully Delivered                                                                                                  | NA            | 95%           | NA            |
| % Nights with an Automatic Bolus and a subsequent CGM reading <60 mg/dL <i>n</i> (%)                                                               | NA            | 6 (9%)        | NA            |
| Among PLGS nights with CGM >140 mg/dL, % algorithm would have recommended an Automatic Bolus within the prior 2 hr <i>n</i> (%)                    | 78 (79%)      | NA            | NA            |
| Among PLGS nights when algorithm would have recommended an Automatic Bolus, % with CGM >140 mg/dL within 2 hr of first recommendation <i>n</i> (%) | 434 (91%)     | NA            | NA            |

To convert glucose to mmol/L, multiply by 0.055
